# Supplementary material for: Thermodynamic Characterization of Rhamnolipid, Triton X-165 and Ethanol as well as Their Mixture Behaviour at the Water-Air Interface
Source: MDPI journal article supplement (doi:10.3390/molecules28134987), 2023-06-25
Supplement: s1 [file s1]

Supplementary Information

**THERMODYNAMIC CHARACTERIZATION OF  
RHAMNOLIPID, TRITON X-165 AND ETHANOL AS  
WELL AS THEIR MIXTURE BEHAVIOUR AT THE  
WATER-AIR INTERFACE**

**Anna Zdziennicka<sup>1</sup>, Maria Luisa Gonzalez-Martin<sup>2,3\*</sup>, Edyta Rekiel<sup>1</sup>, Katarzyna  
Szymczyk<sup>1</sup>, Wojciech Zdziennicki<sup>4</sup> and Bronisław Jańczuk<sup>1</sup>**

<sup>1</sup>Department of Interfacial Phenomena, Institute of Chemical Sciences, Faculty of Chemistry, Maria Curie-Skłodowska University in Lublin, Maria Curie-Skłodowska Sq. 3, 20-031 Lublin, Poland;

<sup>2</sup>Department of Applied Physics, Extremadura University, Avda. de Elvas, s/n, 06006 Badajoz, Spain;

<sup>3</sup>Networking Research Center on Bioengineering, Biomaterials and Nanomedicine (CIBER-BBN), 06006 Badajoz, Spain;  
mlglez@unex.es (M.L.G.-M.)

<sup>4</sup>University Clinical Hospital in Poznań, Przybyszewskiego 49, 60-355 Poznań, Poland;

**Table S1.** The constant of adsorption ( $a$ ) from the Szyszkowski and linear Langmuir equations as well as Gibbs standard free energy of adsorption ( $\Delta G_{ads}^0$ ).

| Individual compounds                |                                                                             |                                                                   |                             |                             |                             |
|-------------------------------------|-----------------------------------------------------------------------------|-------------------------------------------------------------------|-----------------------------|-----------------------------|-----------------------------|
| ET                                  |                                                                             | RL                                                                |                             | TX165                       |                             |
| $a$                                 | $\Delta G_{ads}^0$ (mJ/mol)                                                 | $a$                                                               | $\Delta G_{ads}^0$ (mJ/mol) | $a$                         | $\Delta G_{ads}^0$ (mJ/mol) |
| 0.529777 <sup>a</sup>               | -11.33 <sup>a</sup>                                                         | 3.60602E-07 <sup>a</sup>                                          | -45.92 <sup>a</sup>         | 3.51729E-07 <sup>a</sup>    | -45.98 <sup>a</sup>         |
| 0.53106 <sup>c</sup>                | -11.32 <sup>c</sup>                                                         | 5.73E-7 <sup>b</sup>                                              | -44.79 <sup>b</sup>         | 4.74849E-7 <sup>b</sup>     | -45.25 <sup>b</sup>         |
|                                     |                                                                             | 1.46471E-6 <sup>c</sup>                                           | -42.51 <sup>c</sup>         | 9.44033E-7 <sup>c</sup>     | -43.58 <sup>c</sup>         |
| Binary mixtures                     |                                                                             |                                                                   |                             |                             |                             |
| ET + RL                             |                                                                             |                                                                   |                             |                             |                             |
| $C_{RL}$<br>(mg/dm <sup>3</sup> )   | ET                                                                          |                                                                   | RL                          |                             |                             |
|                                     | $a$                                                                         | $\Delta G_{ads}^0$ (mJ/mol)                                       | $a$                         | $\Delta G_{ads}^0$ (mJ/mol) |                             |
| 0.01                                | 0.706247 <sup>a</sup><br>0.62219 <sup>c</sup>                               | -10.63 <sup>a</sup><br>-10.84 <sup>c</sup>                        | 1.55521E-6 <sup>c</sup>     | -42.26 <sup>c</sup>         |                             |
| 0.5                                 | 1.090464 <sup>a</sup><br>0.7695 <sup>c</sup>                                | -9.57 <sup>c</sup><br>-10.08 <sup>c</sup>                         | 3.0569E-7 <sup>c</sup>      | -45.98 <sup>c</sup>         |                             |
| 5                                   | 1.258248 <sup>a</sup><br>0.5144 <sup>c</sup>                                | -9.22 <sup>a</sup><br>-10.74 <sup>c</sup>                         | 1.03389E-5 <sup>c</sup>     | -37.09 <sup>c</sup>         |                             |
| 20                                  | 0.982206 <sup>a</sup><br>0.3951 <sup>c</sup>                                | -9.82 <sup>a</sup><br>-10.90 <sup>c</sup>                         | 3.08236E-5 <sup>c</sup>     | -33.94 <sup>c</sup>         |                             |
| TX165 + RL                          |                                                                             |                                                                   |                             |                             |                             |
| $C_{RL}$<br>(mg/dm <sup>3</sup> )   | TX165                                                                       |                                                                   | RL                          |                             |                             |
|                                     | $a$                                                                         | $\Delta G_{ads}^0$ (mJ/mol)                                       | $a$                         | $\Delta G_{ads}^0$ (mJ/mol) |                             |
| 0.01                                | 7.01489E-08 <sup>a</sup><br>3.45E-7 <sup>b</sup><br>2.42958E-7 <sup>c</sup> | -49.91 <sup>a</sup><br>-46.03 <sup>b</sup><br>-46.88 <sup>c</sup> | 1.93313E-7 <sup>c</sup>     | -47.44 <sup>c</sup>         |                             |
| 0.5                                 | 1.31912E-06 <sup>a</sup><br>4.35E-6 <sup>b</sup><br>8.45E-07 <sup>c</sup>   | -42.76 <sup>a</sup><br>-39.85 <sup>b</sup><br>-43.85 <sup>c</sup> | 2.09135E-6 <sup>c</sup>     | -41.64 <sup>c</sup>         |                             |
| 5                                   | 2.04808E-06 <sup>a</sup><br>1.90E-06 <sup>c</sup>                           | -41.69 <sup>a</sup><br>-41.88 <sup>c</sup>                        | 1.25667E-5 <sup>c</sup>     | -37.27 <sup>c</sup>         |                             |
| 20                                  | 1.43641E-06 <sup>a</sup><br>1.81E-06 <sup>c</sup>                           | -42.55 <sup>a</sup><br>-42.00 <sup>c</sup>                        | 4.81185E-5 <sup>c</sup>     | -34.00 <sup>c</sup>         |                             |
| TX165 + ET                          |                                                                             |                                                                   |                             |                             |                             |
| $C_{ET}$<br>(mole/dm <sup>3</sup> ) | TX165                                                                       |                                                                   | ET                          |                             |                             |
|                                     | $a$                                                                         | $\Delta G_{ads}^0$ (mJ/mol)                                       | $a$                         | $\Delta G_{ads}^0$ (mJ/mol) |                             |
| 1.07                                | 6.27268E-07 <sup>a</sup><br>2.67E-6 <sup>b</sup><br>7.41E-07 <sup>c</sup>   | -44.57 <sup>a</sup><br>-40.95 <sup>b</sup><br>-44.07 <sup>c</sup> | 1.8763 <sup>c</sup>         | -8.15 <sup>c</sup>          |                             |
| 3.74                                | 6.79548E-07 <sup>a</sup><br>8.76E-6 <sup>b</sup><br>7.90E-07 <sup>c</sup>   | -44.38 <sup>a</sup><br>-37.81 <sup>b</sup><br>-43.67 <sup>c</sup> | 4.59999 <sup>c</sup>        | -5.72 <sup>c</sup>          |                             |
| 6.69                                | 7.5454E-07 <sup>a</sup><br>7.81E-07 <sup>c</sup>                            | -44.12 <sup>a</sup><br>-43.38 <sup>c</sup>                        | 7.6391 <sup>c</sup>         | -4.17 <sup>c</sup>          |                             |
| 10.27                               | 8.16562E-07 <sup>a</sup><br>7.79036E-7 <sup>c</sup>                         | -43.93 <sup>a</sup><br>-42.90 <sup>c</sup>                        | 11.42298 <sup>c</sup>       | -2.70 <sup>c</sup>          |                             |

| Ternary mixtures ET + RL + TX165         |                       |                                 |                      |                                 |                                                                             |                                                                   |
|------------------------------------------|-----------------------|---------------------------------|----------------------|---------------------------------|-----------------------------------------------------------------------------|-------------------------------------------------------------------|
| ET                                       |                       |                                 | RL                   |                                 | TX165                                                                       |                                                                   |
| $C_{RL} = 0.01 \text{ (mg/dm}^3\text{)}$ |                       |                                 |                      |                                 |                                                                             |                                                                   |
| $C_{ET}$<br>(mole/dm <sup>3</sup> )      | $a$                   | $\Delta G_{ads}^0$ (mJ/mo<br>l) | $a$                  | $\Delta G_{ads}^0$ (mJ/mo<br>l) | $a$                                                                         | $\Delta G_{ads}^0$ (mJ/<br>mol)                                   |
| 1.07                                     | 1.91901 <sup>c</sup>  | -8.10 <sup>c</sup>              | 1.35E-6 <sup>c</sup> | -42.71 <sup>c</sup>             | 8.87628E-07 <sup>a</sup><br>1.67E-6 <sup>b</sup><br>8.15847E-7 <sup>c</sup> | -43.73 <sup>a</sup><br>-42.09 <sup>b</sup><br>-43.93 <sup>c</sup> |
| 3.74                                     | 4.68117 <sup>c</sup>  | -5.68 <sup>c</sup>              | 1.37E-6 <sup>c</sup> | -42.66 <sup>c</sup>             | 8.01378E-07 <sup>a</sup><br>5.43E-6 <sup>b</sup><br>8.2334E-7 <sup>c</sup>  | -43.98 <sup>a</sup><br>-38.97 <sup>c</sup><br>-43.91 <sup>c</sup> |
| 6.69                                     | 7.72081 <sup>c</sup>  | -4.14 <sup>c</sup>              | 1.35E-6 <sup>c</sup> | -42.70 <sup>c</sup>             | 9.15922E-07 <sup>a</sup><br>8.04582E-7 <sup>c</sup>                         | -43.65 <sup>a</sup><br>-43.97 <sup>c</sup>                        |
| 10.27                                    | 11.51866 <sup>c</sup> | -2.68 <sup>c</sup>              | 1.35E-6 <sup>c</sup> | -42.71 <sup>c</sup>             | 8.66665E-07 <sup>a</sup><br>8.02366E-7 <sup>c</sup>                         | -43.78 <sup>a</sup><br>-43.97 <sup>c</sup>                        |
| $C_{RL} = 0.5 \text{ (mg/dm}^3\text{)}$  |                       |                                 |                      |                                 |                                                                             |                                                                   |
| 1.07                                     | 2.20037 <sup>c</sup>  | -7.76 <sup>c</sup>              | 2.71E-6 <sup>c</sup> | -41.01 <sup>c</sup>             | 1.29553E-06 <sup>a</sup><br>3.52E-6 <sup>b</sup><br>9.77306E-7 <sup>c</sup> | -42.81 <sup>a</sup><br>-42.09 <sup>b</sup><br>-43.49 <sup>c</sup> |
| 3.74                                     | 5.23458 <sup>c</sup>  | -5.40 <sup>c</sup>              | 2.85E-6 <sup>c</sup> | -40.89 <sup>c</sup>             | 1.51102E-06 <sup>a</sup><br>7.98E-6 <sup>b</sup><br>1.03502E-6 <sup>c</sup> | -42.43 <sup>a</sup><br>-38.03 <sup>b</sup><br>-43.35 <sup>c</sup> |
| 6.69                                     | 8.16887 <sup>c</sup>  | -4.01 <sup>c</sup>              | 2.64E-6 <sup>c</sup> | -41.07 <sup>c</sup>             | 1.29075E-06 <sup>a</sup><br>9.34968E-7 <sup>c</sup>                         | -42.81 <sup>a</sup><br>-43.60 <sup>c</sup>                        |
| 10.27                                    | 12.02144 <sup>c</sup> | -2.58 <sup>c</sup>              | 2.59E-6 <sup>c</sup> | -41.12 <sup>c</sup>             | 1.10939E-06 <sup>a</sup><br>9.14786E-7 <sup>c</sup>                         | -43.18 <sup>a</sup><br>-43.65 <sup>c</sup>                        |
| $C_{RL} = 5 \text{ (mg/dm}^3\text{)}$    |                       |                                 |                      |                                 |                                                                             |                                                                   |
| 1.07                                     | 2.87718 <sup>c</sup>  | -7.11 <sup>c</sup>              | 1.52E-5 <sup>c</sup> | -36.81 <sup>c</sup>             | 2.61519E-06 <sup>a</sup><br>5.67E-6 <sup>b</sup><br>1.36628E-6 <sup>c</sup> | -41.09 <sup>a</sup><br>-39.11 <sup>b</sup><br>-42.68 <sup>c</sup> |
| 3.74                                     | 6.46327 <sup>c</sup>  | -4.89 <sup>c</sup>              | 1.57E-5 <sup>c</sup> | -36.73 <sup>c</sup>             | 2.45759E-06 <sup>a</sup><br>5.67E-6 <sup>b</sup><br>1.46688E-6 <sup>c</sup> | -41.25 <sup>a</sup><br>-38.87 <sup>b</sup><br>-42.50 <sup>c</sup> |
| 6.69                                     | 9.35242 <sup>c</sup>  | -3.68 <sup>c</sup>              | 1.46E-5 <sup>c</sup> | -36.90 <sup>c</sup>             | 1.88616E-06 <sup>a</sup><br>1.24779E-6 <sup>c</sup>                         | -41.89 <sup>a</sup><br>-42.90 <sup>c</sup>                        |
| 10.27                                    | 13.70777 <sup>c</sup> | -2.26 <sup>c</sup>              | 1.46E-5 <sup>c</sup> | -36.90 <sup>c</sup>             | 1.85605E-06 <sup>a</sup><br>1.24712E-6 <sup>c</sup>                         | -41.93 <sup>a</sup><br>-42.90 <sup>c</sup>                        |
| $C_{RL} = 20 \text{ (mg/dm}^3\text{)}$   |                       |                                 |                      |                                 |                                                                             |                                                                   |
| 1.07                                     | 2.4993 <sup>c</sup>   | -7.45 <sup>c</sup>              | 5.07E-5 <sup>c</sup> | -33.87 <sup>c</sup>             | 1.70465E-06 <sup>a</sup><br>1.14315E-6 <sup>c</sup>                         | -42.14 <sup>a</sup><br>-43.11 <sup>c</sup>                        |
| 3.74                                     | 6.32273 <sup>c</sup>  | -4.94 <sup>c</sup>              | 5.34E-5 <sup>c</sup> | -33.75 <sup>c</sup>             | 2.1713E-06 <sup>a</sup><br>1.41522E-6 <sup>c</sup>                          | -41.55 <sup>a</sup><br>-42.59 <sup>c</sup>                        |
| 6.69                                     | 10.23963 <sup>c</sup> | -3.46 <sup>c</sup>              | 5.4E-5 <sup>c</sup>  | -33.72 <sup>c</sup>             | 2.28014E-06 <sup>a</sup><br>1.46873E-6 <sup>c</sup>                         | -41.43 <sup>a</sup><br>-43.11 <sup>c</sup>                        |
| 10.27                                    | 14.92871 <sup>c</sup> | -2.05 <sup>c</sup>              | 5.4E-5 <sup>c</sup>  | -33.72 <sup>c</sup>             | 2.33992E-06 <sup>a</sup><br>1.46781E-6 <sup>c</sup>                         | -41.37 <sup>a</sup><br>-42.59 <sup>c</sup>                        |

<sup>a</sup> – the values obtained based on the linear Langmuir equation

<sup>b</sup> – the values obtained based on the Szyszkowski equation,      <sup>c</sup> – the values obtained based on  $\frac{C}{X^S}$

a)

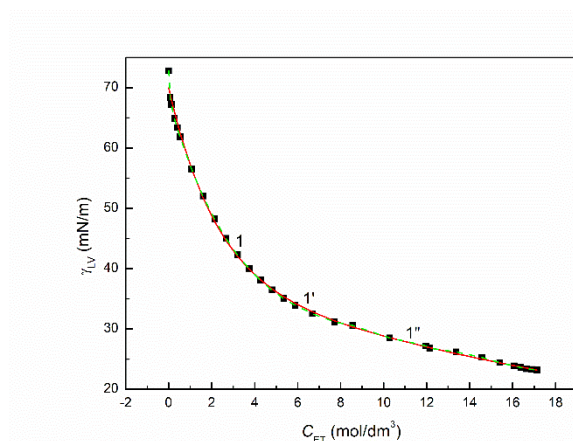

b)

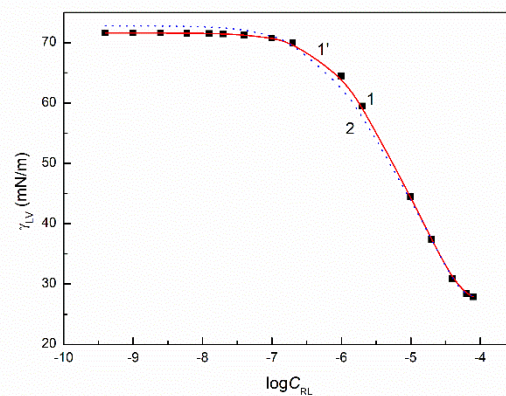

c)

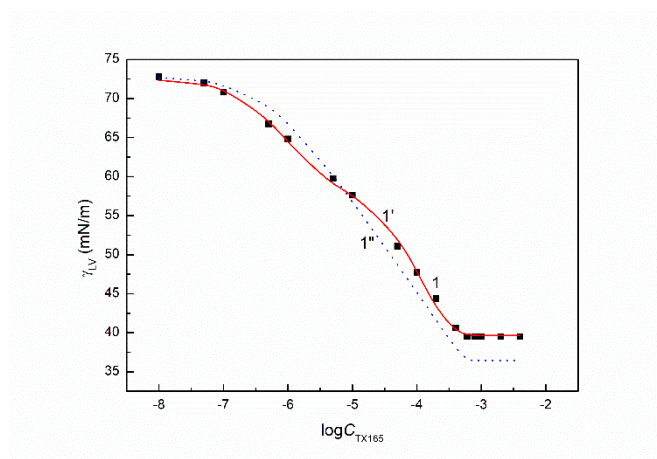

**Figure S1.** A plot of the surface tension ( $\gamma_{LV}$ ) of the aqueous solution of ET as function of its concentration ( $C_{ET}$ ) (a), surface tension of the aqueous solution of RL (b) and TX165 (c) as function of the logarithm of its concentration ( $\log C$ ). Points 1 correspond to the measured values, curves 1' and 1'' correspond to the values calculated from Equations (1) and (3), curve 2 correspond to values calculated from Eq. (2), respectively.

a)

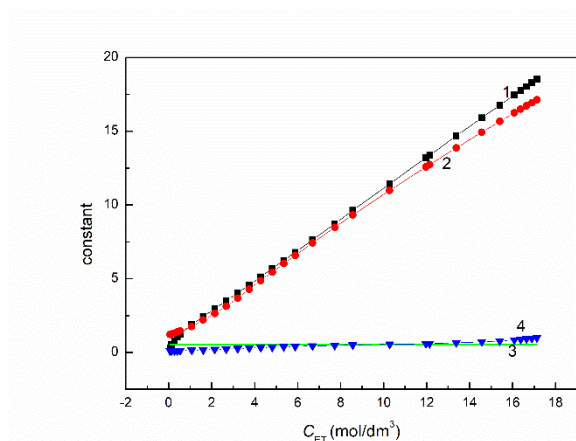

b)

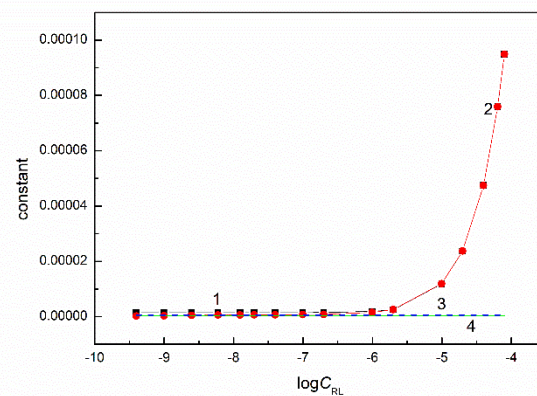

c)

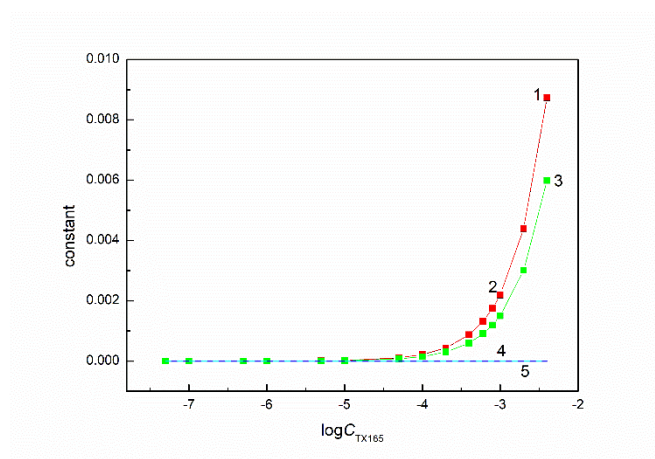

**Figure S2.** A plot of  $\frac{C}{X^S}$  (curves 1 and 2),  $a$  (curve 3) and  $\frac{a_{ET}}{X^S}$  (curve 4) for ET vs. its concentration ( $C_{ET}$ ) (a) (curve 1 and 2 obtained using  $X^S$  calculated based on the Frumkin and our Equations, respectively, curve 3 correspond to the values calculated from Equation (2) and curve 4 to the obtained based on ET activity ( $a_{ET}$ ) as well plot of  $\frac{C}{X^S}$  (curves 1 and 2),  $a$  (curves 3 and 4) for RL (b) and TX165 (c) vs. the logarithm of its concentration ( $\log C$ ) (curves 1 – 3 the same as in Figure S2a and curves 4 and 5 obtained from the Szyszkowski equation (Equation (2))).

a)

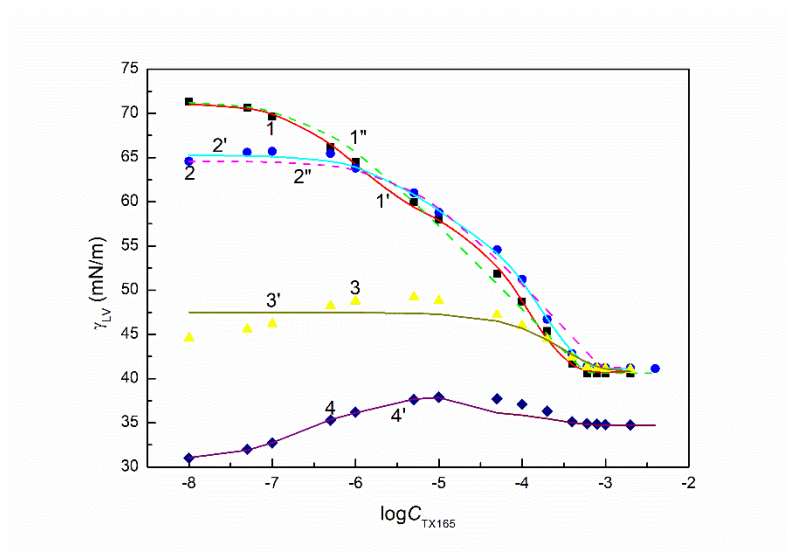

b)

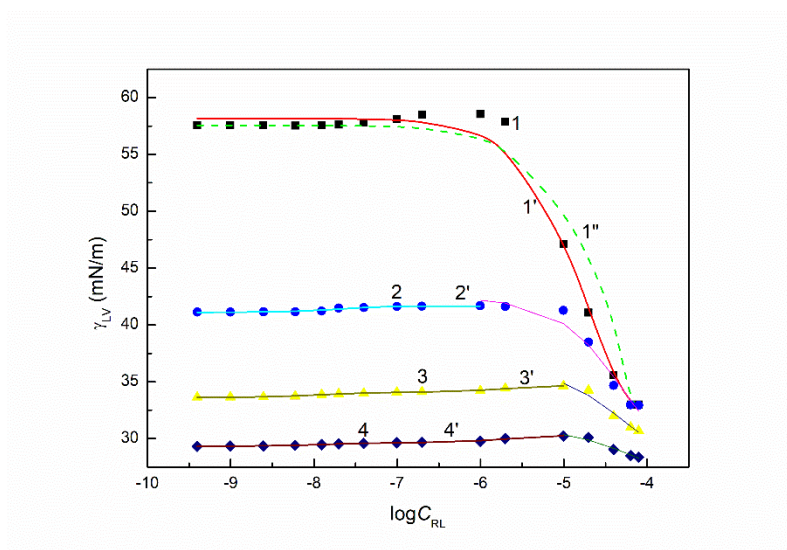

**Figure S3.** A plot of the surface tension ( $\gamma_{LV}$ ) of the aqueous solution of the RL + TX165 mixture (a) at the constant RL concentration equal to 0.01 mg/dm<sup>3</sup> (points 1, curves 1' and 1''), 0.5 mg/dm<sup>3</sup> (points 2, curves 2' and 2''), 5 mg/dm<sup>3</sup> (points 3 and curve 3') and 20 mg/dm<sup>3</sup> (points 4 and curve 4') vs. the logarithm of TX165 concentration ( $\log C_{TX165}$ ) as well as plot of the surface tension of the aqueous solution of the RL + ET mixture (b) at the constant ET concentration equal to 1.07 mol/dm<sup>3</sup> (points 1, curves 1' and 1''), 3.74 mol/dm<sup>3</sup> (points 2 and curve 2'), 6.69 mol/dm<sup>3</sup> (points 3 and curve 3') and 10.27 mol/dm<sup>3</sup> (points 4 and curve 4') vs. the logarithm of the RL concentration ( $\log C_{RL}$ ). Points 1 – 4 correspond to the measured values, curves 1' – 4' correspond to the values calculated from Equation (1) and curves 1'' and 2'' correspond to the values calculated from the Szyszkowski equation (Equation (2)).



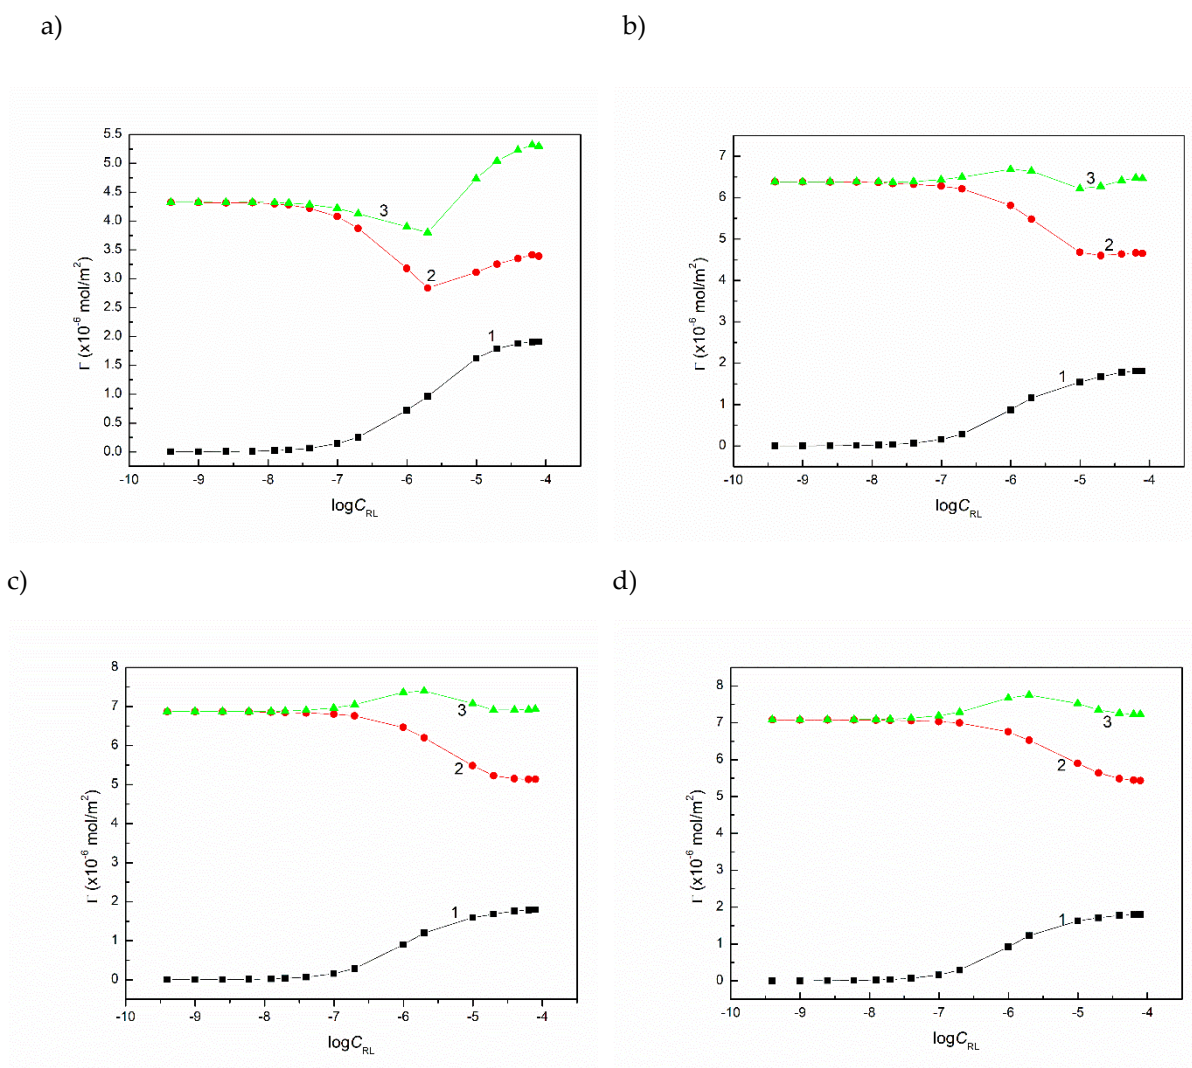

**Figure S4.** A plot of the Frumkin concentration at the solution-air interface ( $\Gamma$ ) of RL (curve 1), ET (curve 2) and their sum (curve 3) at the constant ET concentration equal to 1.07 mol/dm<sup>3</sup> (a), 3.74 mol/dm<sup>3</sup> (b), 6.69 mol/dm<sup>3</sup> (c) and 10.27 mol/dm<sup>3</sup> (d) vs. the logarithm of the RL concentration ( $\log C_{RL}$ ).

a)

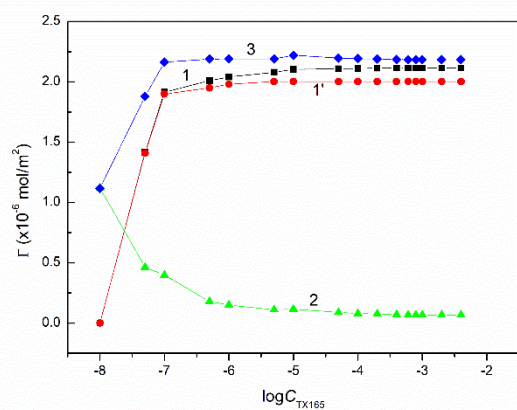

b)

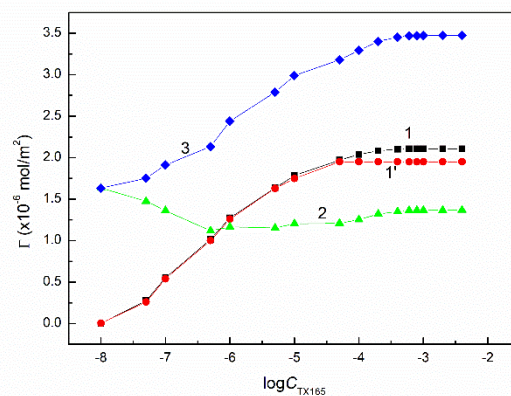

c)

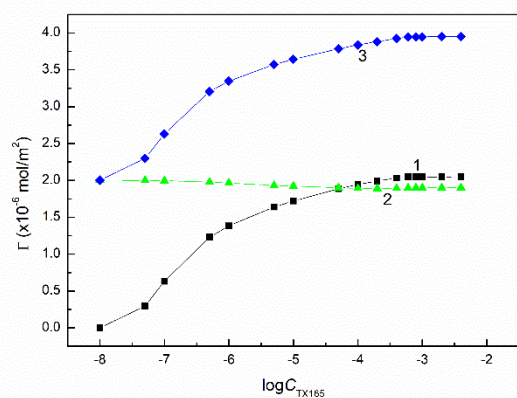

d)

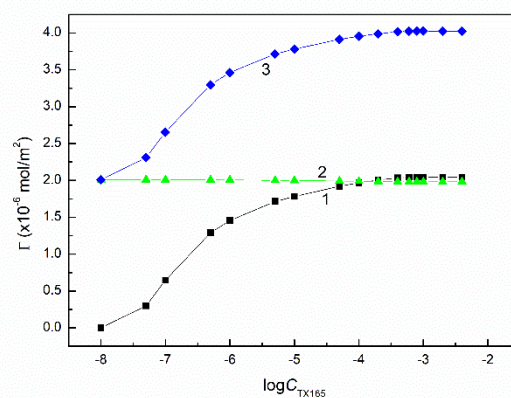

**Figure S5.** A plot of the Gibbs concentration ( $\Gamma$ ) of TX165 (curve 1') as well as the Frumkin concentration ( $\Gamma$ ) of TX165 (curve 1), RL (curve 2) and their sum (curve 3) at the constant RL concentration equal to 0.01 mg/dm<sup>3</sup> (a), 0.5 mg/dm<sup>3</sup> (b), 5 mg/dm<sup>3</sup> (c) and 20 mg/dm<sup>3</sup> (d) vs. the logarithm of the TX165 concentration ( $C_{\text{TX165}}$ ).



a)

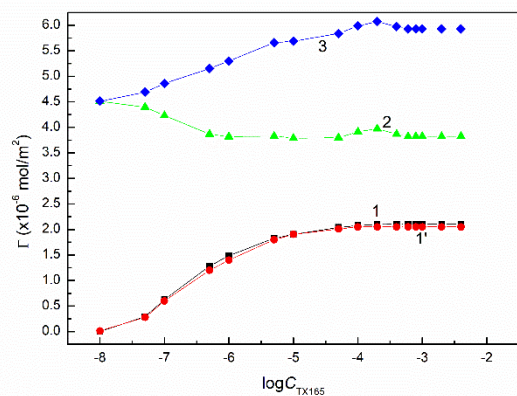

b)

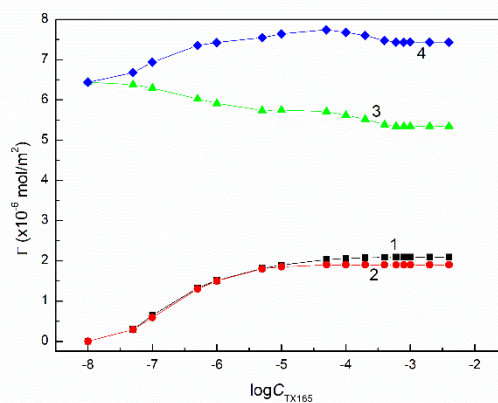

c)

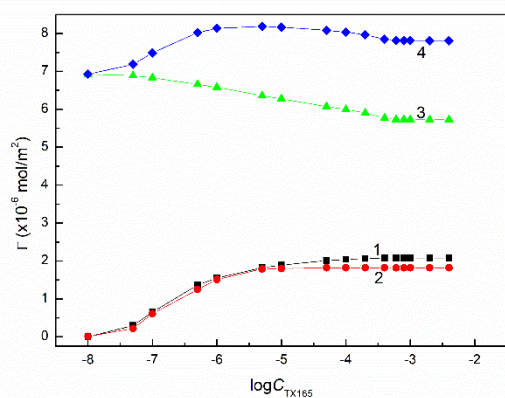

d)

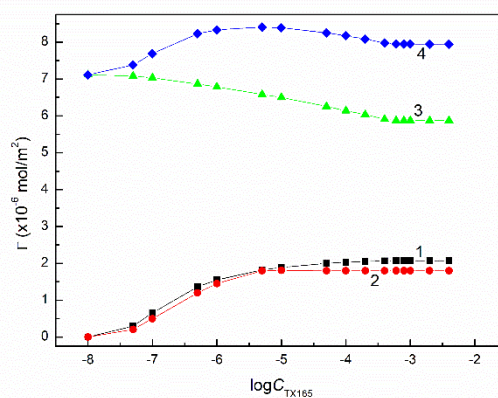

**Figure S6.** A plot of the Gibbs concentration ( $\Gamma$ ) of TX165 (curve 1') as well as the Frumkin concentration ( $\Gamma$ ) of TX165 (curve 1), ET (curve 2) and their sum (curve 3) at the constant ET concentration equal 1.07 mol/dm<sup>3</sup> (a), 3.74 mol/dm<sup>3</sup> (b), 6.69 mol/dm<sup>3</sup> (c) and 10.27 mol/dm<sup>3</sup> (d) vs. the logarithm of the TX165 concentration ( $C_{TX165}$ ).

a)

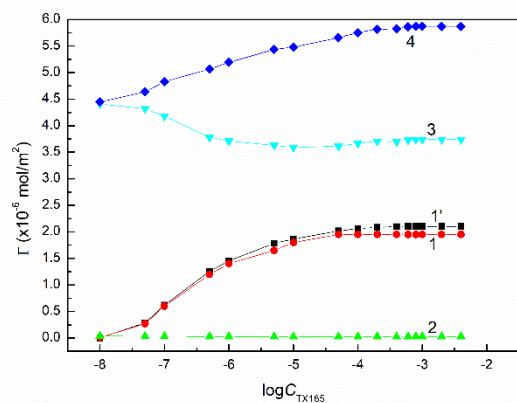

b)

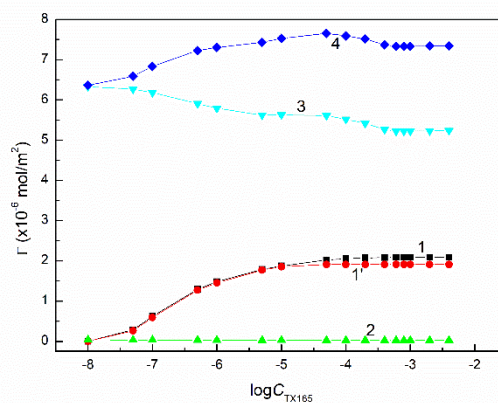

c)

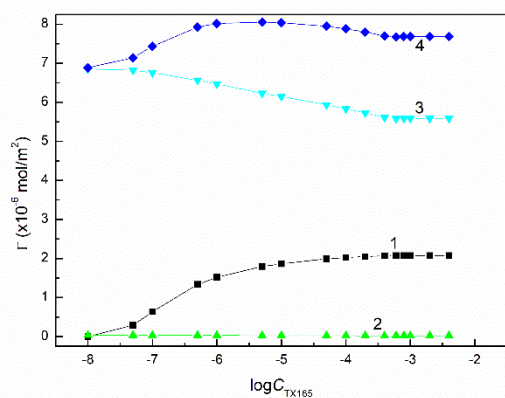

d)

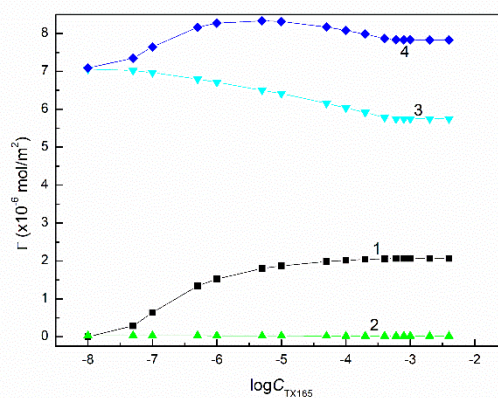

**Figure S7.** A plot of the Gibbs concentration ( $\Gamma$ ) of TX165 (curve 1') as well as the Frumkin concentration ( $\Gamma$ ) of TX165 (curve 1), RL (curve 2), ET (curve 3) and their sum (curve 4) vs. the logarithm of the TX165 concentration ( $C_{\text{TX165}}$ ) at the constant RL concentration equal to 0.01 mg/dm<sup>3</sup> and constant ET concentration equal to 1.07 mol/dm<sup>3</sup> (a), 3.74 mol/dm<sup>3</sup> (b), 6.69 mol/dm<sup>3</sup> (c) and 10.27 mol/dm<sup>3</sup> (d).

a)

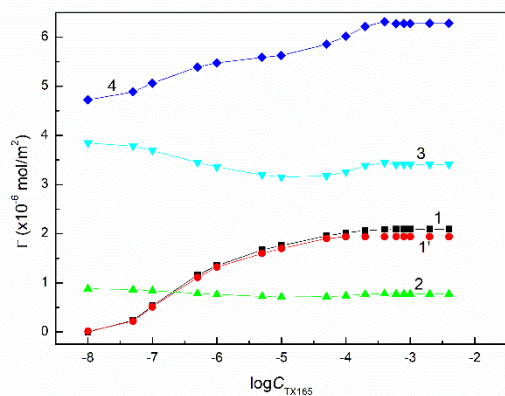

b)

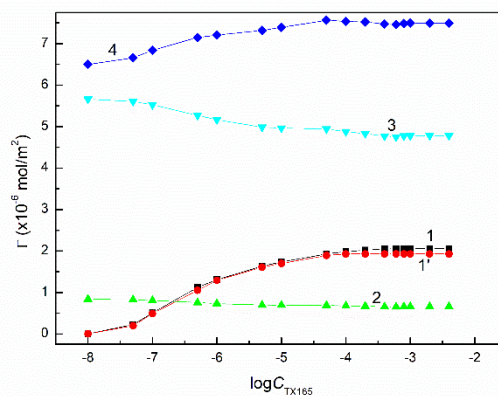

c)

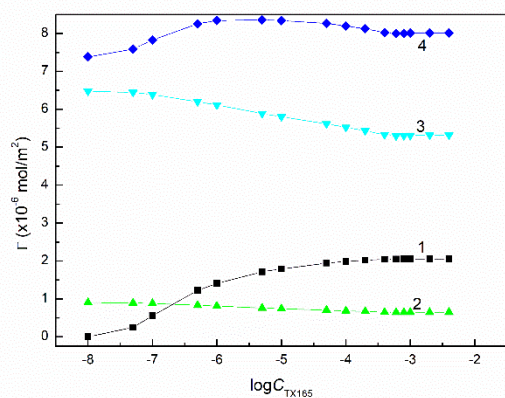

d)

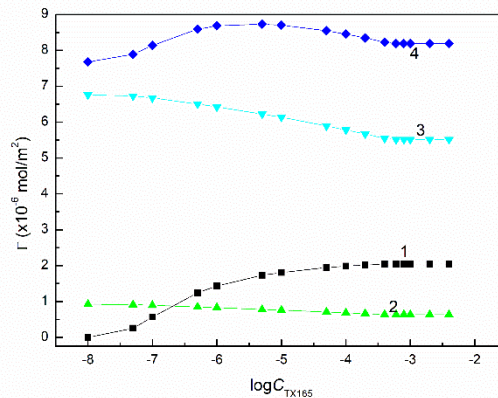

**Figure S8.** A plot of the Gibbs concentration ( $\Gamma$ ) of TX165 (curve 1') as well as the Frumkin concentration ( $\Gamma$ ) of TX165 (curve 1), RL (curve 2), ET (curve 3) and their sum (curve 4) vs. the logarithm of the TX165 concentration ( $C_{\text{TX165}}$ ) at the constant RL concentration equal to 0.5 mg/dm<sup>3</sup> and constant ET concentration equal to 1.07 mol/dm<sup>3</sup> (a), 3.74 mol/dm<sup>3</sup> (b), 6.69 mol/dm<sup>3</sup> (c) and 10.27 mol/dm<sup>3</sup> (d).



a)

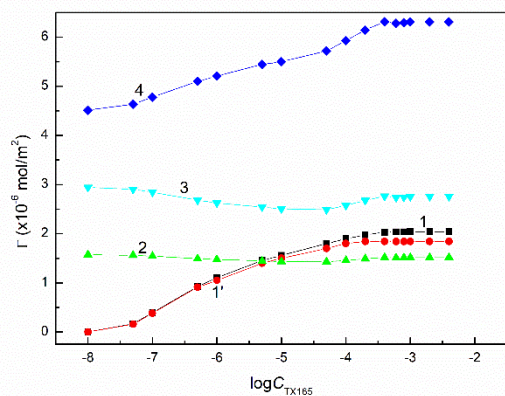

b)

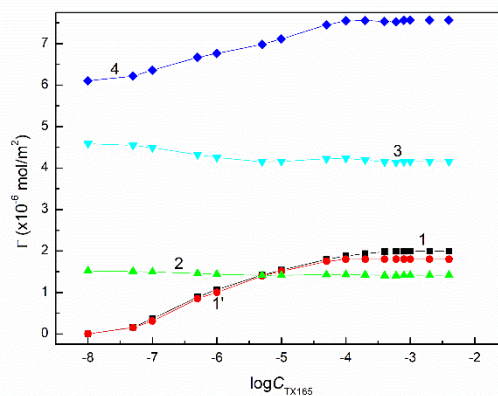

c)

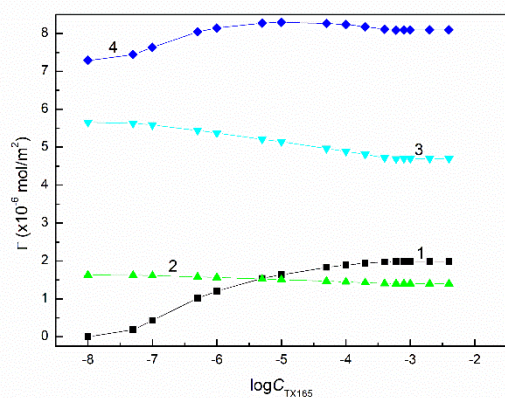

d)

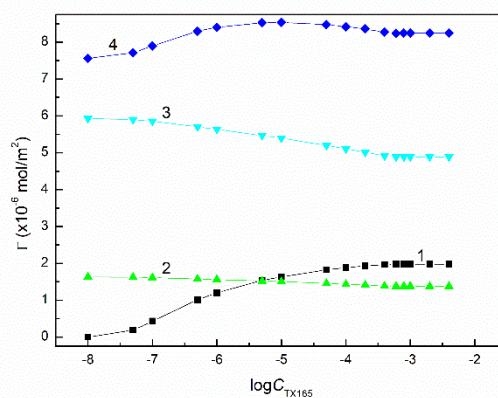

**Figure S9.** A plot of the Gibbs concentration ( $\Gamma$ ) of TX165 (curve 1') as well as the Frumkin concentration ( $\Gamma$ ) of TX165 (curve 1), RL (curve 2), ET (curve 3) and their sum (curve 4) vs. the logarithm of the TX165 concentration ( $C_{\text{TX165}}$ ) at the constant RL concentration equal to 5 mg/dm<sup>3</sup> and constant ET concentration equal to 1.07 mol/dm<sup>3</sup> (a), 3.74 mol/dm<sup>3</sup> (b), 6.69 mol/dm<sup>3</sup> (c) and 10.27 mol/dm<sup>3</sup> (d).

a)

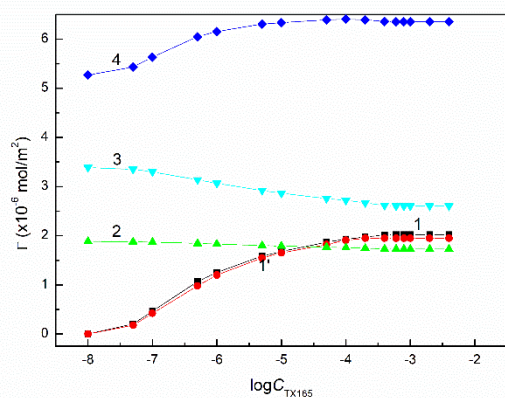

b)

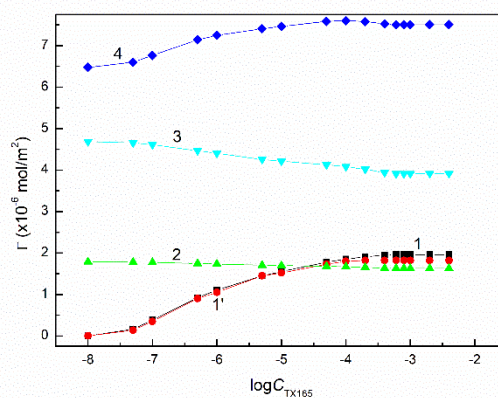

c)

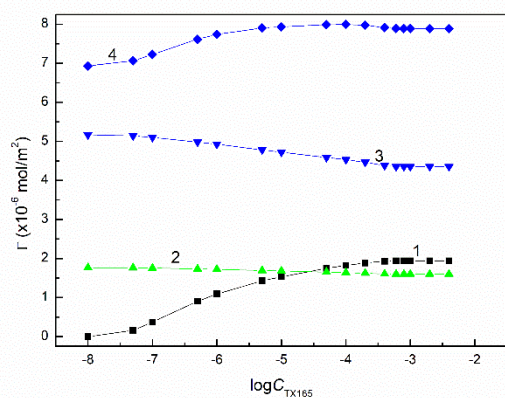

d)

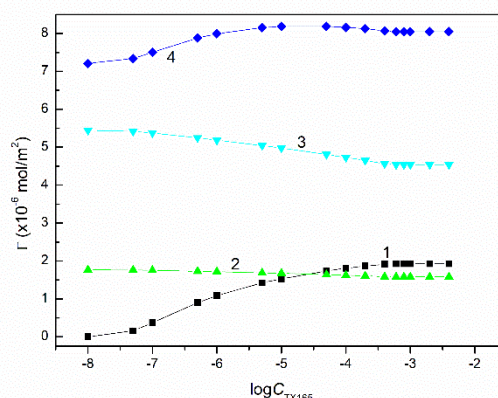

**Figure S10.** A plot of the Gibbs concentration ( $\Gamma$ ) of TX165 (curve 1') as well as the Frumkin concentration ( $\Gamma$ ) of TX165 (curve 1), RL (curve 2), ET (curve 3) and their sum (curve 4) vs. the logarithm of the TX165 concentration ( $C_{TX165}$ ) at the constant RL concentration equal to 20 mg/dm<sup>3</sup> and constant ET concentration equal to 1.07 mol/dm<sup>3</sup> (a), 3.74 mol/dm<sup>3</sup> (b), 6.69 mol/dm<sup>3</sup> (c) and 10.27 mol/dm<sup>3</sup> (d).



a)

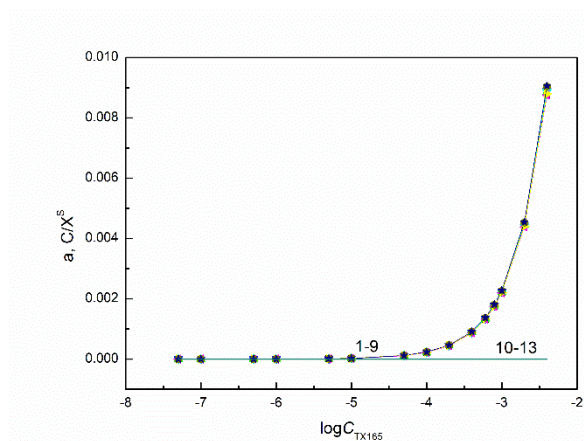

b)

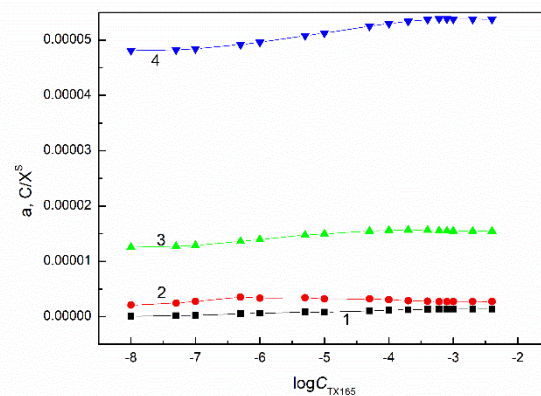

c)

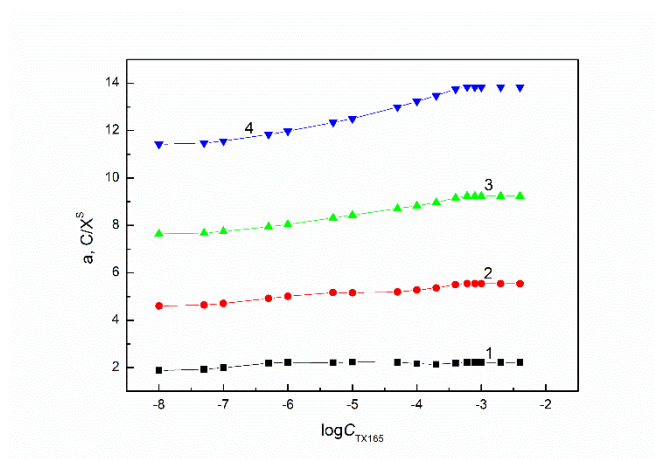

**Figure S11.** A plot of  $\frac{C}{X^S}$  (curves 1 – 9) and  $a$  (curves 10 – 13) for TX165 (a), RL (b) and ET (c) vs. the logarithm of the TX165 concentration ( $C_{TX165}$ ). The values of  $\frac{C}{X^S}$  were obtained based on the Figures S5 and S6. The values of  $a$  were calculated based on the Szyszkowski (curves 10 and 11) and the linear Langmuir equations (curves 12 and 13) for the constant RL concentration equal to 0.01 mg/dm<sup>3</sup> and ET concentration 1.07 mol/dm<sup>3</sup>.

a)

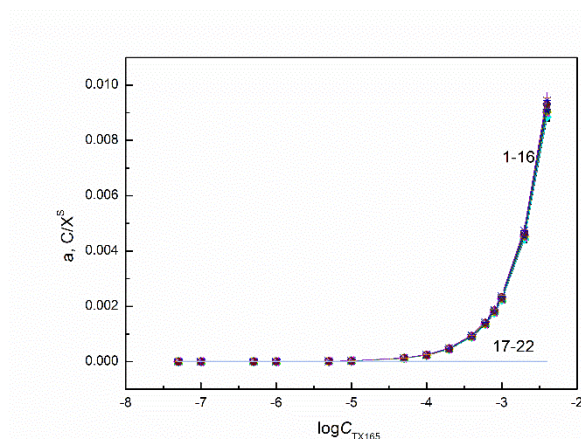

b)

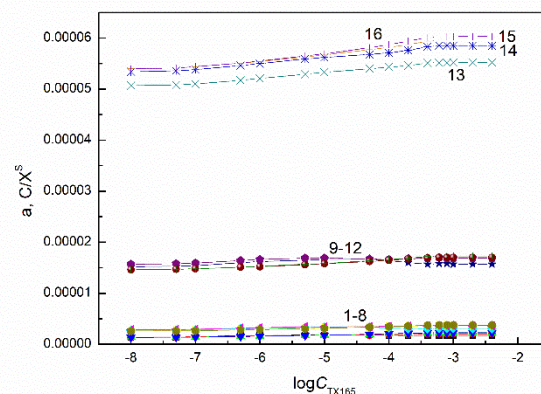

c)

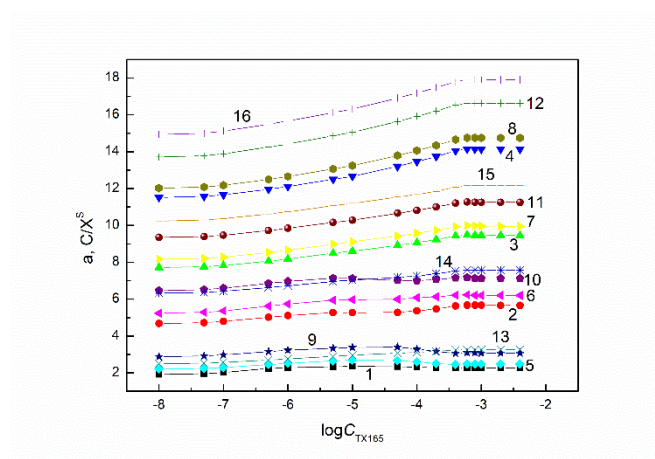

**Figure S12.** A plot of  $\frac{C}{X^S}$  (curves 1 – 16) and  $a$  (curves 17 – 22) for TX165 (a), RL (b) and ET (c) vs. the logarithm of the TX165 concentration ( $C_{TX165}$ ). The values of  $\frac{C}{X^S}$  were obtained based on the Figures S7 – S10. The values  $a$  were calculated based on the Szyszkowski (curves 17 - 19) and linear Langmuir equations (curves 20 - 22) for the constant RL concentration 0.01 mg/dm<sup>3</sup> and ET concentration 1.07 mol/dm<sup>3</sup>. Curves 1 – 4 correspond to the constant RL concentration equal 0.01 mg/dm<sup>3</sup>, curves 5 – 8 mg/dm<sup>3</sup> to 0.5 mg/dm<sup>3</sup>, curves 9 – 12 mg/dm<sup>3</sup> to 5 and curves 13 – 16 to the RL concentration equal to 20 mg/dm<sup>3</sup>.

a)

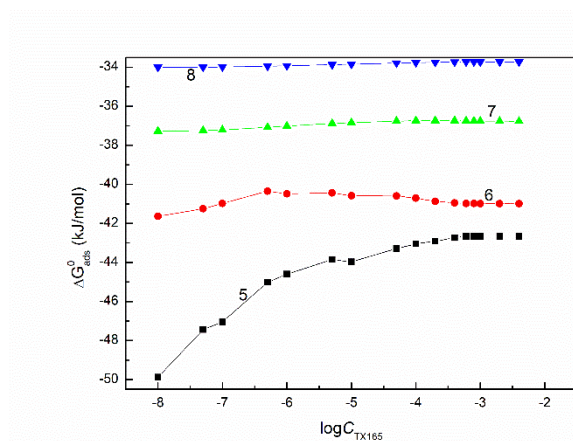

b)

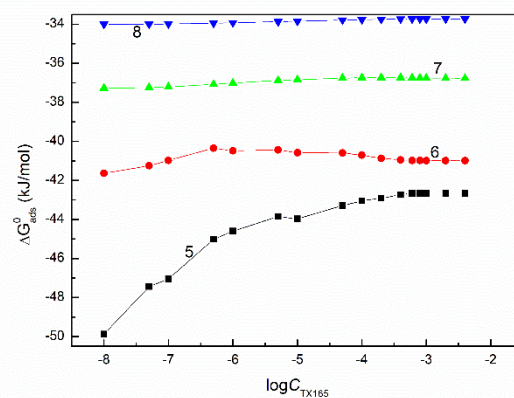

c)

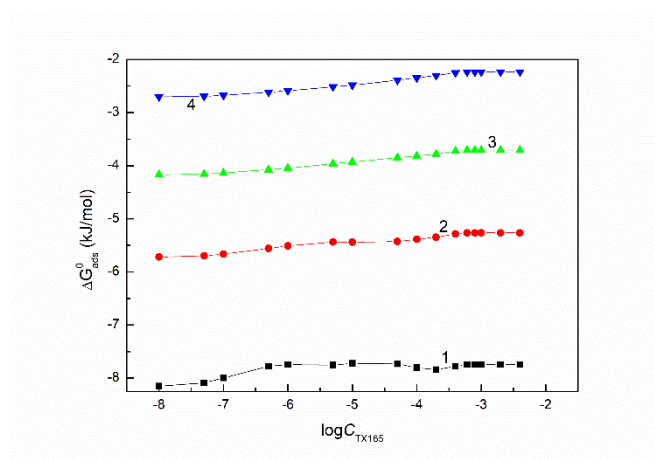

**Figure S13.** A plot of the standard Gibbs free energy of adsorption ( $\Delta G_{ads}^0$ ) calculated from Equation (19) for TX165 (a), RL (b) and ET (c) vs. the logarithm of the TX165 concentration ( $C_{TX165}$ ). Curves 1 – 4 correspond to the constant ET concentration equal 1.07, 3.74, 6.69 and 10.27 mol/dm<sup>3</sup>, curves 5 – 8 correspond to the constant RL concentration equal 0.01, 0.5, 5 and 20 mg/dm<sup>3</sup>.

a)

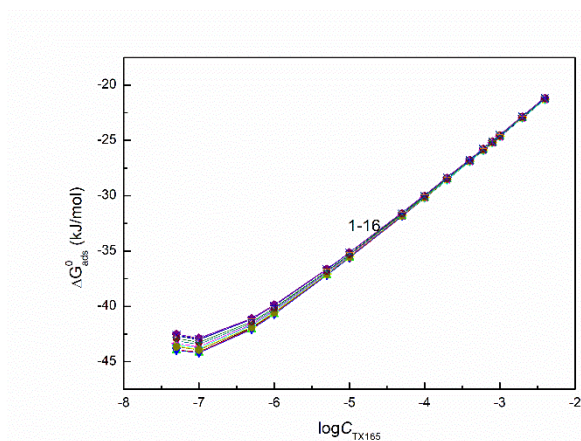

b)

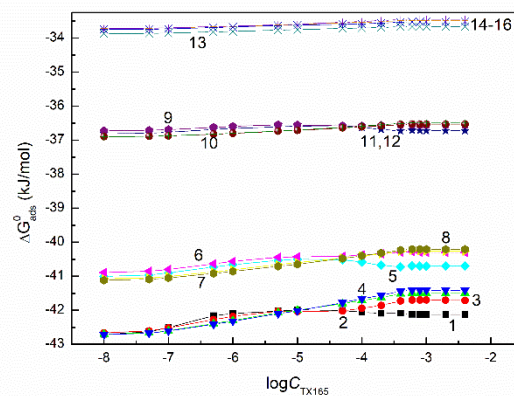

c)

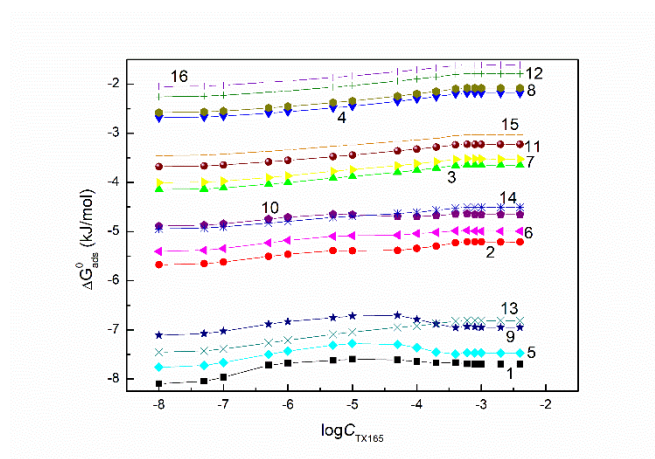

**Figure S14.** A plot of the standard Gibbs free energy of adsorption ( $\Delta G_{ads}^0$ ) calculated from Equation (19) for TX165 (a), RL (b) and ET (c) vs. the logarithm of the TX165 concentration ( $C_{TX165}$ ). Curves 1 – 4 correspond to the constant ET concentration equal 1.07, 3.74, 6.69 and 10.27 mol/dm<sup>3</sup>. Curves 1 – 4 correspond to the constant RL concentration equal 0.01 mg/dm<sup>3</sup>, curves 5 – 8 mg/dm<sup>3</sup> to 0.5 mg/dm<sup>3</sup>, curves 9 – 12 mg/dm<sup>3</sup> to 5 and curves 13 – 16 to the RL concentration equal to 20 mg/dm<sup>3</sup>. Curves 1, 5, 9 and 13 correspond to the constant ET concentration equal to 1.07 mol/dm<sup>3</sup>, curves 2, 6, 10 and 14 correspond to the constant ET concentration equal to 3,74 mol/dm<sup>3</sup>, curves 3, 7, 11 and 15 correspond to the constant ET concentration equal to 6,69 mol/dm<sup>3</sup>, curves 4, 8, 12 and 16 correspond to the constant ET concentration equal to 10.27 mol/dm<sup>3</sup>,
